# Supplementary material for: Effect of Kasai procedure on liver transplantation in children with biliary atresia: a systematic review and updated meta-analysis
Source: PubMed Central journal article supplement — Transl Pediatr. 2024 Jan 24;13(1):10–25. doi: 10.21037/tp-23-504 (PMC10839284; doi:10.21037/tp-23-504), 2024-01-24
Supplement: tp-13-01-10-rc.pdf [file tp-13-01-10-rc.pdf]

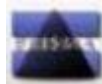

## PRISMA 2020 Checklist

| Section/topic           | Item No | Checklist item                                                                                                                                                                                                                                                                                       | Reported on Page Number/Line Number | Reported on Section/Paragraph           |
|-------------------------|---------|------------------------------------------------------------------------------------------------------------------------------------------------------------------------------------------------------------------------------------------------------------------------------------------------------|-------------------------------------|-----------------------------------------|
| <b>TITLE</b>            |         |                                                                                                                                                                                                                                                                                                      |                                     |                                         |
| Title                   | 1       | Identify the report as a systematic review.                                                                                                                                                                                                                                                          | Page 1/Line 3-4                     | Title                                   |
| <b>ABSTRACT</b>         |         |                                                                                                                                                                                                                                                                                                      |                                     |                                         |
| Abstract                | 2       | See the PRISMA 2020 for Abstracts checklist (Table 2).                                                                                                                                                                                                                                               | Page 3-4/Line 34-63                 | Abstract                                |
| <b>INTRODUCTION</b>     |         |                                                                                                                                                                                                                                                                                                      |                                     |                                         |
| Rationale               | 3       | Describe the rationale for the review in the context of existing knowledge.                                                                                                                                                                                                                          | Page 6/Line 72-77                   | Introduction 1/Paragraph 1              |
| Objectives              | 4       | Provide an explicit statement of the objective(s) or question(s) the review addresses.                                                                                                                                                                                                               | Page 6/Line 77-85                   | Introduction 1/Paragraph 1              |
| <b>METHODS</b>          |         |                                                                                                                                                                                                                                                                                                      |                                     |                                         |
| Eligibility criteria    | 5       | Specify the inclusion and exclusion criteria for the review and how studies were grouped for the syntheses.                                                                                                                                                                                          | Page 7-8/Line 106-120               | Methods/Literature searches             |
| Information sources     | 6       | Specify all databases, registers, websites, organisations, reference lists and other sources searched or consulted to identify studies. Specify the date when each source was last searched or consulted.                                                                                            | Page 7/Line 94-96                   | Methods/Search strategy                 |
| Search strategy         | 7       | Present the full search strategies for all databases, registers and websites, including any filters and limits used.                                                                                                                                                                                 | Page 7/Line 100                     | Methods/Search strategy                 |
| Selection process       | 8       | Specify the methods used to decide whether a study met the inclusion criteria of the review, including how many reviewers screened each record and each report retrieved, whether they worked independently, and if applicable, details of automation tools used in the process.                     | Page 8/Line 123-127                 | Methods/Study selection and definitions |
| Data collection process | 9       | Specify the methods used to collect data from reports, including how many reviewers collected data from each report, whether they worked independently, any processes for obtaining or confirming data from study investigators, and if applicable, details of automation tools used in the process. | Page 8/Line 130-133                 | Methods/Data extraction                 |
| Data items              | 10a     | List and define all outcomes for which data were sought. Specify whether all results that were compatible with each outcome domain in each study were sought (e.g. for all measures, time points, analyses), and if not, the methods used to decide which results to collect.                        | Page 8/Line 134-143                 | Methods/Data extraction                 |
|                         | 10b     | List and define all other variables for which data were sought (e.g. participant and intervention characteristics, funding sources). Describe any assumptions made about any missing or unclear information.                                                                                         | Page 8/Line 134-143                 | Methods/Data extraction                 |

|                               |     |                                                                                                                                                                                                                                                                   |                         |                                                                                         |
|-------------------------------|-----|-------------------------------------------------------------------------------------------------------------------------------------------------------------------------------------------------------------------------------------------------------------------|-------------------------|-----------------------------------------------------------------------------------------|
| Study risk of bias assessment | 11  | Specify the methods used to assess risk of bias in the included studies, including details of the tool(s) used, how many reviewers assessed each study and whether they worked independently, and if applicable, details of automation tools used in the process. | Page 9/Line 146-151     | Methods/Validity assessment                                                             |
| Effect measures               | 12  | Specify for each outcome the effect measure(s) (e.g. risk ratio, mean difference) used in the synthesis or presentation of results.                                                                                                                               | Page 9/Line 155-157     | Methods/Statistical analysis                                                            |
| Synthesis methods             | 13a | Describe the processes used to decide which studies were eligible for each synthesis.                                                                                                                                                                             | Page 9-10/Line 157-160  | Methods/Statistical analysis                                                            |
|                               | 13b | Describe any methods required to prepare the data for presentation or synthesis, such as handling of missing summary statistics, or data conversions.                                                                                                             | Page 10/Line 163-166    | Methods/Statistical analysis                                                            |
|                               | 13c | Describe any methods used to tabulate or visually display results of individual studies and syntheses.                                                                                                                                                            | Page 9/Line 154-155     | Methods/Statistical analysis                                                            |
|                               | 13d | Describe any methods used to synthesize results and provide a rationale for the choice(s). If meta-analysis was performed, describe the model(s), method(s) to identify the presence and extent of statistical heterogeneity, and software package(s) used.       | Page 9-10/Line 154-163  | Methods/Statistical analysis                                                            |
|                               | 13e | Describe any methods used to explore possible causes of heterogeneity among study results.                                                                                                                                                                        | Page 9/Line 157-158     | Methods/Statistical analysis                                                            |
|                               | 13f | Describe any sensitivity analyses conducted to assess robustness of the synthesized results.                                                                                                                                                                      | Page 10/Line 161-163    | Methods/Statistical analysis                                                            |
| Reporting bias assessment     | 14  | Describe any methods used to assess risk of bias due to missing results in a synthesis (arising from reporting biases).                                                                                                                                           | Page 10/Line 160-161    | Methods/Statistical analysis                                                            |
| Certainty assessment          | 15  | Describe any methods used to assess certainty (or confidence) in the body of evidence for an outcome.                                                                                                                                                             | Page 9-10/Line 155-156  | Methods/Statistical analysis                                                            |
| <b>RESULTS</b>                |     |                                                                                                                                                                                                                                                                   |                         |                                                                                         |
| Study selection               | 16a | Describe the results of the search and selection process, from the number of records identified in the search to the number of studies included in the review, ideally using a flow diagram.                                                                      | Page 10/Line 171-176    | Results/Search process                                                                  |
|                               | 16b | Cite studies that met many but not all inclusion criteria ('near-misses') and explain why they were excluded.                                                                                                                                                     | Page 10/Line 171-176    | Results/Search process                                                                  |
| Study characteristics         | 17  | Cite each included study and present its characteristics.                                                                                                                                                                                                         | Page 10-11/Line 179-192 | Results/Quality assessment of studies included in the meta-analysis-Study baseline data |
| Risk of bias in studies       | 18  | Present assessments of risk of bias for each included study.                                                                                                                                                                                                      | Page 10/Line 179-181    | Results/Quality assessment of studies included in the meta-analysis                     |
| Results of individual studies | 19  | For all outcomes, present, for each study: (a) summary statistics for each group (where appropriate) and (b) an effect estimate and its precision (e.g. confidence/credible interval), ideally using structured tables or plots.                                  | Page 11-14/Line 195-264 | Results/Preoperative indicators-Graft survival rate                                     |

|                                                |     |                                                                                                                                                                                                                                                                                      |                         |                                                     |
|------------------------------------------------|-----|--------------------------------------------------------------------------------------------------------------------------------------------------------------------------------------------------------------------------------------------------------------------------------------|-------------------------|-----------------------------------------------------|
| Results of syntheses                           | 20a | For each synthesis, briefly summarise the characteristics and risk of bias among contributing studies.                                                                                                                                                                               | Page 11-14/Line 195-264 | Results/Preoperative indicators-Graft survival rate |
|                                                | 20b | Present results of all statistical syntheses conducted. If meta-analysis was done, present for each the summary estimate and its precision (e.g. confidence/credible interval) and measures of statistical heterogeneity. If comparing groups, describe the direction of the effect. | Page 11-14/Line 195-264 | Results/Preoperative indicators-Graft survival rate |
|                                                | 20c | Present results of all investigations of possible causes of heterogeneity among study results.                                                                                                                                                                                       | Page 15-16/Line 275-309 | Results/Sensitivity analysis-Subgroup analysis      |
|                                                | 20d | Present results of all sensitivity analyses conducted to assess the robustness of the synthesized results.                                                                                                                                                                           | Page 15/Line 275-285    | Results/Sensitivity analysis                        |
| Reporting biases                               | 21  | Present assessments of risk of bias due to missing results (arising from reporting biases) for each synthesis assessed.                                                                                                                                                              | Page 15/Line 275-285    | Results/Sensitivity analysis                        |
| Certainty of evidence                          | 22  | Present assessments of certainty (or confidence) in the body of evidence for each outcome assessed.                                                                                                                                                                                  | Page 11-14/Line 195-264 | Results/Preoperative indicators-Graft survival rate |
| <b>DISCUSSION</b>                              |     |                                                                                                                                                                                                                                                                                      |                         |                                                     |
| Discussion                                     | 23a | Provide a general interpretation of the results in the context of other evidence.                                                                                                                                                                                                    | Page 17-19/Line 322-371 | Discussion/Explanations of findings                 |
|                                                | 23b | Discuss any limitations of the evidence included in the review.                                                                                                                                                                                                                      | Page 19-20/Line 374-382 | Discussion/Strengths and limitations                |
|                                                | 23c | Discuss any limitations of the review processes used.                                                                                                                                                                                                                                | Page 19-20/Line 374-382 | Discussion/Strengths and limitations                |
|                                                | 23d | Discuss implications of the results for practice, policy, and future research.                                                                                                                                                                                                       | Page 20/Line 386-393    | Conclusions                                         |
| <b>OTHER INFORMATION</b>                       |     |                                                                                                                                                                                                                                                                                      |                         |                                                     |
| Registration and protocol                      | 24a | Provide registration information for the review, including register name and registration number, or state that the review was not registered.                                                                                                                                       | Page 21/Line 400        | Footnote                                            |
|                                                | 24b | Indicate where the review protocol can be accessed, or state that a protocol was not prepared.                                                                                                                                                                                       | Page 21/Line 401        | Footnote                                            |
|                                                | 24c | Describe and explain any amendments to information provided at registration or in the protocol.                                                                                                                                                                                      | Page 21/Line 400-406    | Footnote                                            |
| Support                                        | 25  | Describe sources of financial or non-financial support for the review, and the role of the funders or sponsors in the review.                                                                                                                                                        | Page 20/Line 396-397    | Acknowledgements                                    |
| Competing interests                            | 26  | Declare any competing interests of review authors.                                                                                                                                                                                                                                   | Page 21/Line 402-403    | Footnote                                            |
| Availability of data, code and other materials | 27  | Report which of the following are publicly available and where they can be found: template data collection forms; data extracted from included studies; data used for all analyses; analytic code; any other materials used in the review.                                           | NA                      | NA                                                  |

**Table 2 PRISMA 2020 for Abstracts checklist**

| Section/topic           | Item No | Checklist item                                                                                                                                                                                                                                                                                        | Reported on Page Number/Line Number                      | Reported on Section/Paragraph                            |
|-------------------------|---------|-------------------------------------------------------------------------------------------------------------------------------------------------------------------------------------------------------------------------------------------------------------------------------------------------------|----------------------------------------------------------|----------------------------------------------------------|
| <b>TITLE</b>            |         |                                                                                                                                                                                                                                                                                                       |                                                          |                                                          |
| Title                   | 1       | Identify the report as a systematic review.                                                                                                                                                                                                                                                           | Page 3/Line 31-32                                        | Title                                                    |
| <b>BACKGROUND</b>       |         |                                                                                                                                                                                                                                                                                                       |                                                          |                                                          |
| Objectives              | 2       | Provide an explicit statement of the main objective(s) or question(s) the review addresses.                                                                                                                                                                                                           | Page 3/Line 34-37                                        | Abstract/Background                                      |
| <b>METHODS</b>          |         |                                                                                                                                                                                                                                                                                                       |                                                          |                                                          |
| Eligibility criteria    | 3       | Specify the inclusion and exclusion criteria for the review.                                                                                                                                                                                                                                          | Due to word limit, refer to the methods section          | Due to word limit, refer to the methods section          |
| Information sources     | 4       | Specify the information sources (e.g. databases, registers) used to identify studies and the date when each was last searched.                                                                                                                                                                        | Page 3/Line 38-39                                        | Abstract/Methods                                         |
| Risk of bias            | 5       | Specify the methods used to assess risk of bias in the included studies.                                                                                                                                                                                                                              | Page 3/Line 40                                           | Abstract/Methods                                         |
| Synthesis of results    | 6       | Specify the methods used to present and synthesize results.                                                                                                                                                                                                                                           | Page 3/Line 39-41                                        | Abstract/Methods                                         |
| <b>RESULTS</b>          |         |                                                                                                                                                                                                                                                                                                       |                                                          |                                                          |
| Included studies        | 7       | Give the total number of included studies and participants and summarise relevant characteristics of studies.                                                                                                                                                                                         | Page 3/Line 42-43                                        | Abstract/Results                                         |
| Synthesis of results    | 8       | Present results for main outcomes, preferably indicating the number of included studies and participants for each. If meta-analysis was done, report the summary estimate and confidence/credible interval. If comparing groups, indicate the direction of the effect (i.e. which group is favoured). | Page 3-4/Line 43-57                                      | Abstract/Results                                         |
| <b>DISCUSSION</b>       |         |                                                                                                                                                                                                                                                                                                       |                                                          |                                                          |
| Limitations of evidence | 9       | Provide a brief summary of the limitations of the evidence included in the review (e.g. study risk of bias, inconsistency and imprecision).                                                                                                                                                           | Page 4/Line 58-63                                        | Abstract/Conclusion                                      |
| Interpretation          | 10      | Provide a general interpretation of the results and important implications.                                                                                                                                                                                                                           | Page 4/Line 58-63                                        | Abstract/Conclusion                                      |
| <b>OTHER</b>            |         |                                                                                                                                                                                                                                                                                                       |                                                          |                                                          |
| Funding                 | 11      | Specify the primary source of funding for the review.                                                                                                                                                                                                                                                 | Due to word limit, refer to the acknowledgements section | Due to word limit, refer to the acknowledgements section |
| Registration            | 12      | Provide the register name and registration number.                                                                                                                                                                                                                                                    | Due to word limit, refer to the acknowledgements section | Due to word limit, refer to the acknowledgements section |

Article Information: <https://dx.doi.org/10.21037/tp-23-504>

\*As the checklist was provided upon initial submission, the page number/line number reported may be changed due to copyediting and may not be referable in the published version. In this case, the section/paragraph may be used as an alternative reference.
