# Supplementary material for: Effect of Kasai procedure on liver transplantation in children with biliary atresia: a systematic review and updated meta-analysis
Source: PubMed Central journal article supplement — Transl Pediatr. 2024 Jan 24;13(1):10–25. doi: 10.21037/tp-23-504 (PMC10839284; doi:10.21037/tp-23-504), 2024-01-24
Supplement: tp-13-01-10-supplementary.pdf [file tp-13-01-10-supplementary.pdf]

**Table S1** Newcastle-Ottawa quality assessment scale for included studies

| First author year country | Selection | Comparability | Outcome | Total |
|---------------------------|-----------|---------------|---------|-------|
| Millis 1988 USA           | 4         | 1             | 2       | 7     |
| Wood 1990 USA             | 3         | 2             | 1       | 6     |
| Meister 1993 USA          | 4         | 2             | 3       | 9     |
| Sandler 1997 Canada       | 4         | 2             | 2       | 8     |
| Chardot 1999 France       | 3         | 2             | 2       | 7     |
| Diem 2003 Belgium         | 4         | 2             | 2       | 8     |
| Visser 2004 USA           | 4         | 2             | 2       | 8     |
| Cowles 2008 USA           | 4         | 1             | 1       | 6     |
| Tiao 2008 China           | 4         | 1             | 1       | 6     |
| Guo 2010 China            | 3         | 2             | 2       | 7     |
| Alexopoulos 2012 USA      | 4         | 1             | 3       | 8     |
| Wang 2013 China           | 4         | 2             | 3       | 9     |
| Celik 2014 Turkey         | 4         | 2             | 1       | 7     |
| Neto 2015 Brazil          | 4         | 1             | 2       | 7     |
| Chung 2015 China          | 4         | 1             | 2       | 7     |
| Safwan 2016 India         | 4         | 1             | 2       | 7     |
| Mohan 2016 India          | 4         | 1             | 1       | 6     |
| Yang 2018 China           | 4         | 2             | 2       | 8     |
| Li 2019 China             | 4         | 2             | 3       | 9     |
| Chang 2021 China          | 4         | 1             | 3       | 8     |
| Tambucci 2021 Belgium     | 4         | 1             | 2       | 7     |
| Li 2022 China             | 4         | 1             | 2       | 7     |
| Zhang 2022 China          | 4         | 1             | 2       | 7     |
| Lemoine 2022 USA          | 4         | 2             | 3       | 9     |
| Yoeli 2022 USA            | 4         | 1             | 2       | 7     |
| Liu 2022 China            | 4         | 1             | 2       | 7     |

**Table S2** Data summary information on indications for transplantation in children from each study

| First author year country | Indications for liver transplantation                                                          |
|---------------------------|------------------------------------------------------------------------------------------------|
| Millis 1988 USA           | Not mentioned                                                                                  |
| Wood 1990 USA             | Not mentioned                                                                                  |
| Meister 1993 USA          | Not mentioned                                                                                  |
| Sandler 1997 Canada       | Not mentioned                                                                                  |
| Chardot 1999 France       | Liver failure (n=191)                                                                          |
| Diem 2003 Belgium         | Early liver failure (n=252)                                                                    |
|                           | Digestive hemorrhage (n=26)                                                                    |
|                           | Late liver failure (n=38)                                                                      |
|                           | Recurrent cholangitis (n=12)                                                                   |
| Visser 2004 USA           | Failure to thrive (n=19)                                                                       |
|                           | Inadequate drainage (n=16)                                                                     |
|                           | Coagulopathy (n=12)                                                                            |
|                           | Recurrent cholangitis (n=6)                                                                    |
|                           | Portal hypertension (n=5)                                                                      |
|                           | Gastrointestinal bleeding (n=4)                                                                |
|                           | Ascites (n=2)                                                                                  |
|                           | Portal vein thrombosis (n=1)                                                                   |
|                           | Intractable pruritis (n=1)                                                                     |
| Cowles 2008 USA           | Not mentioned                                                                                  |
| Tiao 2008 China           | Not mentioned                                                                                  |
| Guo 2010 China            | Not mentioned                                                                                  |
| Alexopoulos 2012 USA      | Not mentioned                                                                                  |
| Wang 2013 China           | Not mentioned                                                                                  |
| Celik 2014 Turkey         | Not mentioned                                                                                  |
| Neto 2015 Brazil          | Not mentioned                                                                                  |
| Chung 2015 China          | Portal hypertension (n=60)                                                                     |
| Safwan 2016 India         | Not mentioned                                                                                  |
| Mohan 2016 India          | Not mentioned                                                                                  |
| Yang 2018 China           | Not mentioned                                                                                  |
| Li 2019 China             | Not mentioned                                                                                  |
| Chang 2021 China          | Not mentioned                                                                                  |
| Tambucci 2021 Belgium     | Not mentioned                                                                                  |
| Li 2022 China             | Not mentioned                                                                                  |
| Zhang 2022 China          | Not mentioned                                                                                  |
| Lemoine 2022 USA          | Cholangitis (n=31; KPE <sup>†</sup> =31; pLT <sup>‡</sup> =0)                                  |
|                           | Infections (other than cholangitis) (n=47; KPE <sup>†</sup> =41; pLT <sup>‡</sup> =6)          |
|                           | Gastrointestinal bleeding (n=22; KPE <sup>†</sup> =20; pLT <sup>‡</sup> =2)                    |
|                           | Ascites or spontaneous bacterial peritonitis (n=30; KPE <sup>†</sup> =25; pLT <sup>‡</sup> =5) |
|                           | Malnutrition (n=28; KP <sup>†</sup> =24; pLT <sup>‡</sup> =4)                                  |
| Yoeli 2022 USA            | Not mentioned                                                                                  |
| Liu 2022 China            | Jaundice (n=127; N-KP <sup>§</sup> =43; P-KP <sup>¶</sup> =84)                                 |
|                           | Cholangitis (n=62; N-KP <sup>§</sup> =0; P-KP <sup>¶</sup> =62)                                |
|                           | GEV bleeding (n=30; N-KP <sup>§</sup> =1; P-KP <sup>¶</sup> =29)                               |
|                           | Severe hypersplenism (n=12; N-KP <sup>§</sup> =1; P-KP <sup>¶</sup> =11)                       |
|                           | Growth retardation (n=60; N-KP <sup>§</sup> =15; P-KP <sup>¶</sup> =45)                        |
|                           | Massive ascites (n=3; N-KP <sup>§</sup> =0; P-KP <sup>¶</sup> =3)                              |
|                           | Liver failure (n=32; N-KP <sup>§</sup> =14; P-KP <sup>¶</sup> =18)                             |

<sup>†</sup>, KPE = Kasai portoenterostomy; <sup>‡</sup>, pLT = primary liver transplantation; <sup>§</sup>, N-KP = non-Kasai procedure; <sup>¶</sup>, P-KP = post Kasai procedure.



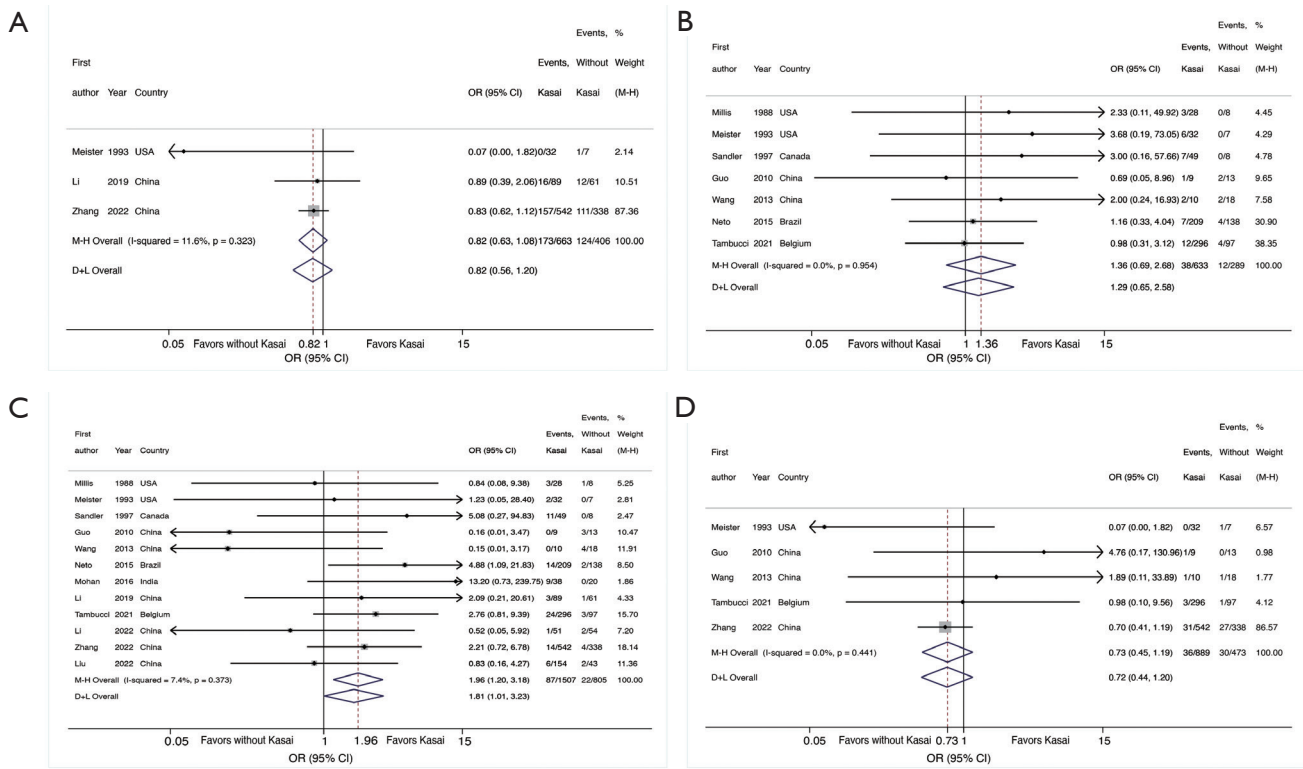

**Figure S2** Forest plot of the meta-analysis of postoperative indicators. (A) Lymphatic fistula. (B) Bleeding. (C) Intestinal perforation. (D) Intestinal obstruction. Fixed effects model: M-H overall, random effects model: D + L overall. M-H, Mantel-Haenszel; D + L, DerSimonian and Laird; OR, odds ratio; CI, confidence interval.

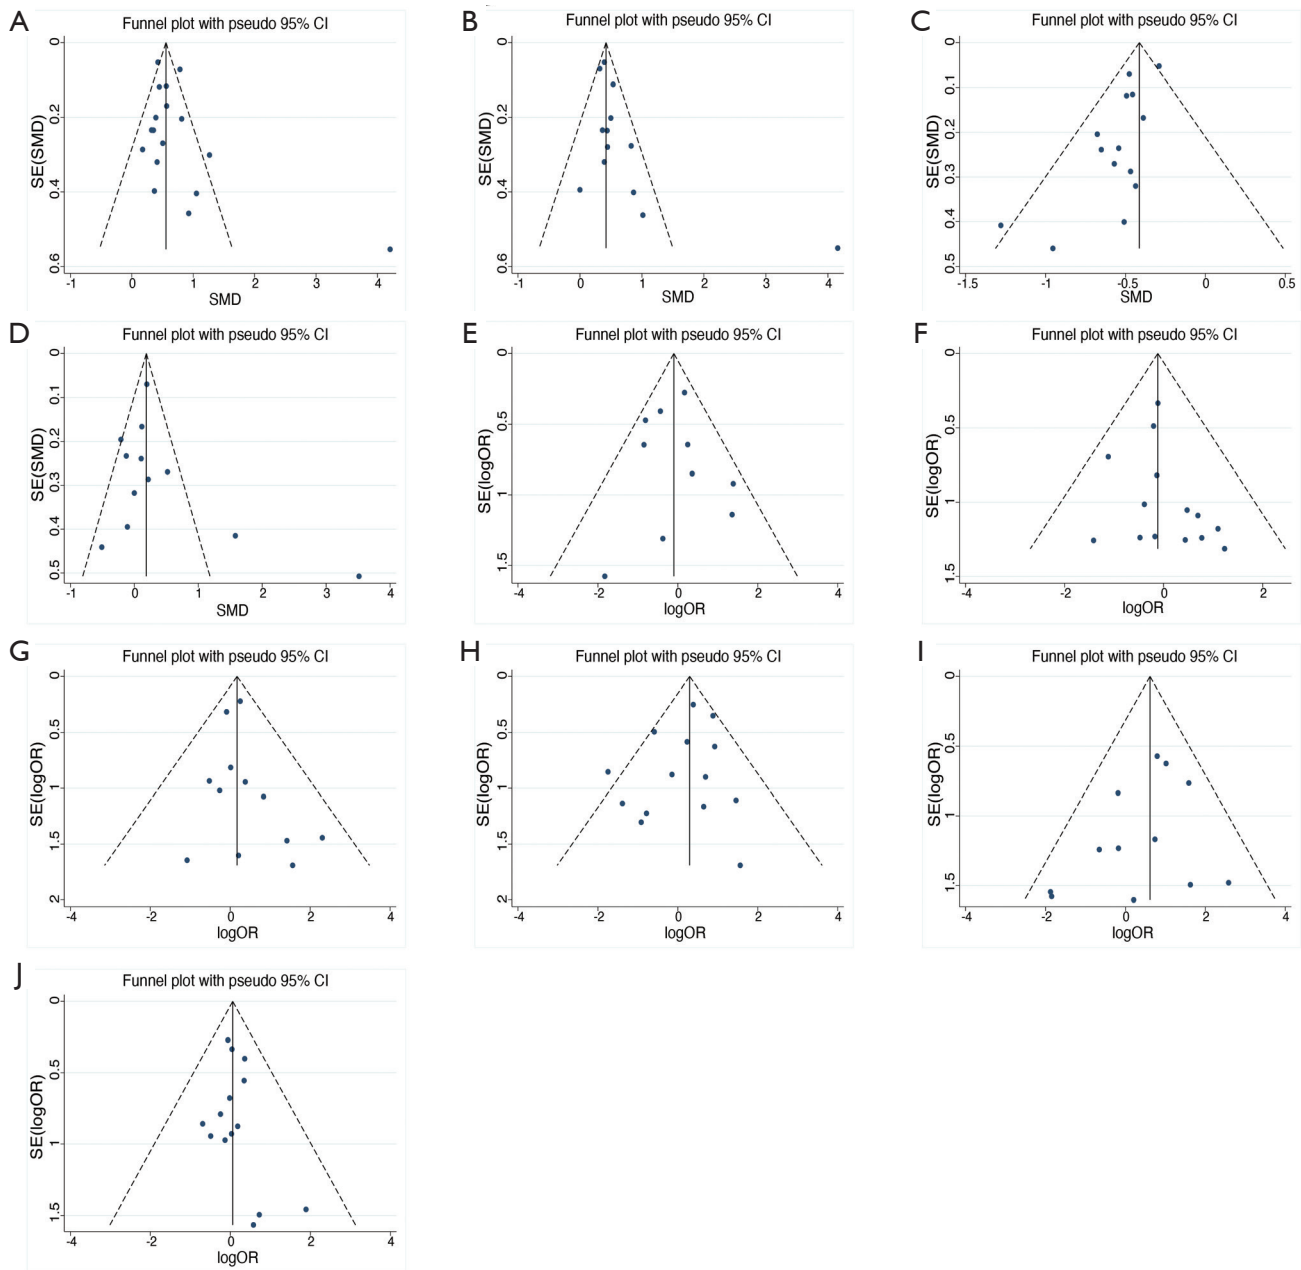

**Figure S3** Plot of funnel. (A) Age at surgery. (B) Weight at surgery. (C) PELD score. (D) Operation time. (E) Reoperation. (F) Hepatic artery complications. (G) Portal vein complications. (H) Biliary complications. (I) Intestinal perforation. (J) 1-year survival rate. SE, standard error; SMD, standardized mean difference; CI, confidence interval; PELD, pediatric end-stage liver disease; OR, odds ratio.

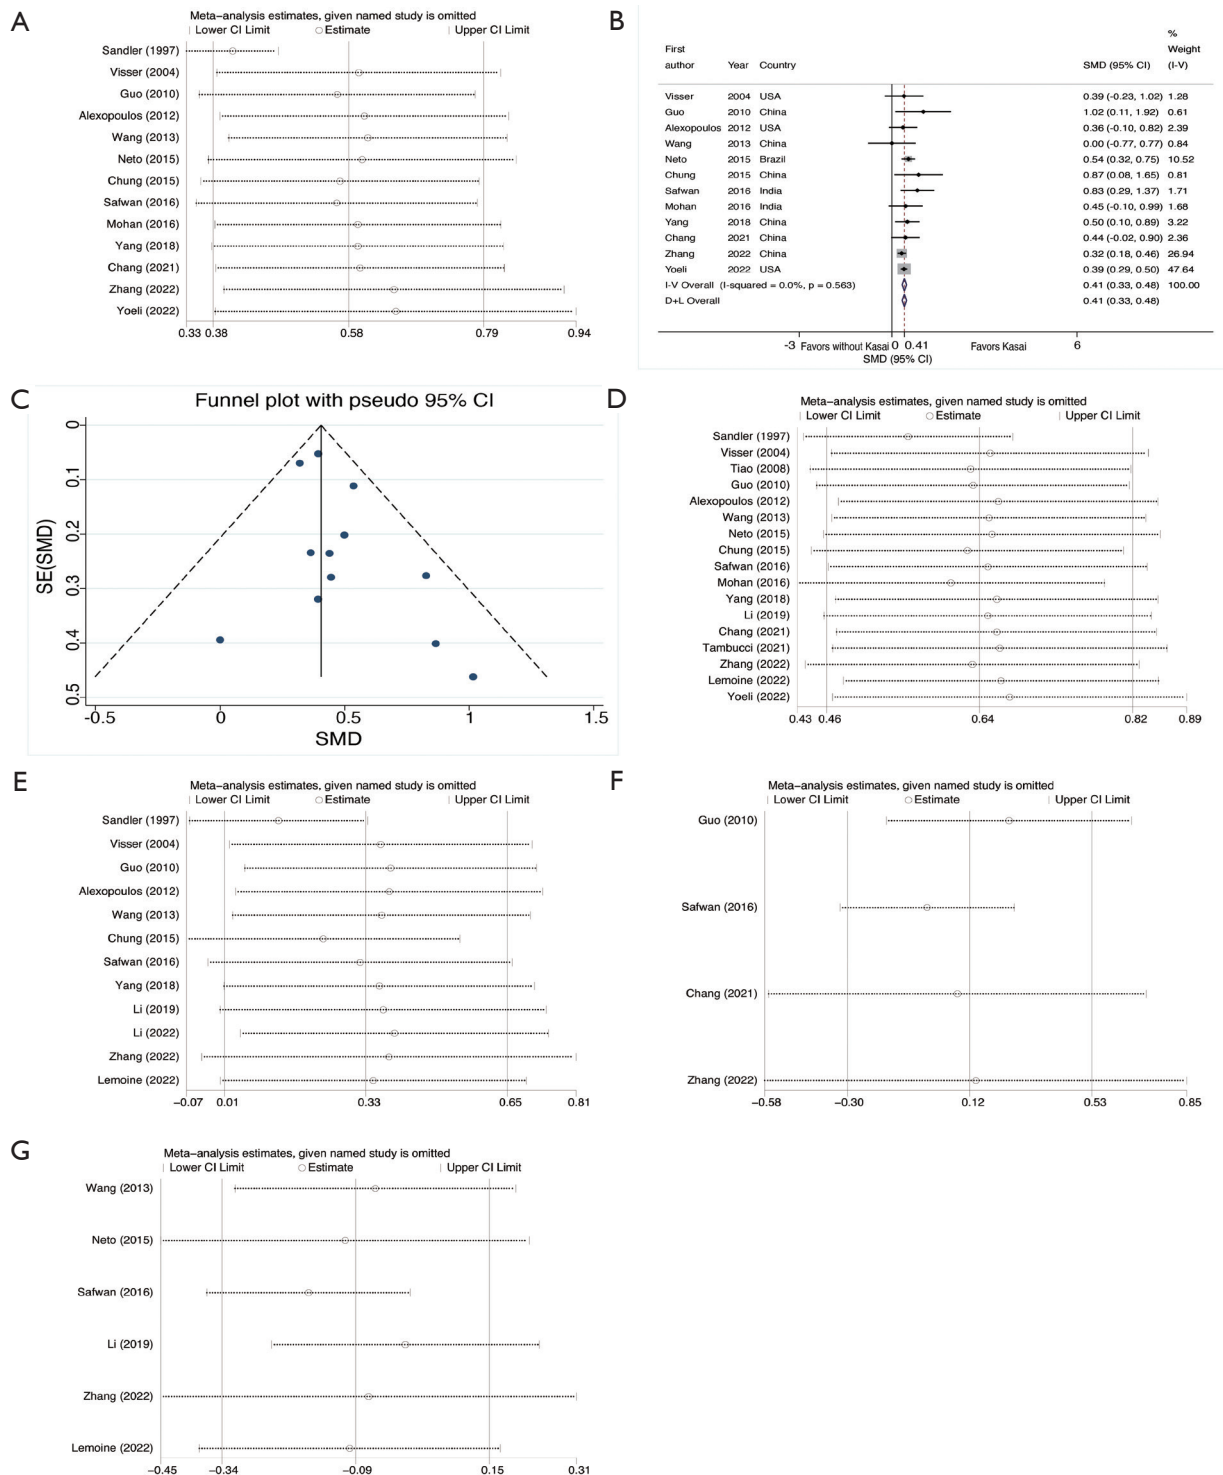

**Figure S4** Sensitivity analysis. (A) Sensitivity analysis of weight at surgery. (B) Forest plot of meta-analysis of surgical weight after excluding one study. (C) Funnel plot of meta-analysis of surgical weight after excluding one study. (D) Sensitivity analysis of age at surgery. (E) Sensitivity analysis of operation time. (F) Sensitivity analysis of intraoperative blood transfusion. (G) Sensitivity analysis of length of ICU stay. Fixed effects model: I-V overall, random effects model: D + L overall. I-V, Inverse-Variance; D + L, DerSimonian and Laird; SMD, standardized mean difference; CI, confidence interval; SE, standard error; ICU, intensive care unit.
